RESEARCH ARTICLE

# Relationship of Liver X Receptors $\alpha$ and Endoglin Levels in Serum and Placenta with Preeclampsia

Jing Wang<sup>1</sup>, Xing Dong<sup>2</sup>, Hong-yan Wu<sup>1</sup>, Nan Wu<sup>1</sup>, Xue-jun Zhang<sup>1</sup>, Xin Wang<sup>1</sup>, Lixin Shang<sup>1\*</sup>

**1** Department of Obstetrics and Gynecology, General Hospital of Beijing Military Command, Beijing, China, **2** Department of General Surgery, General Hospital of Beijing Military Command, Beijing, China

\* [13581598951@163.com](mailto:13581598951@163.com)

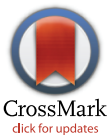

**OPEN ACCESS**

**Citation:** Wang J, Dong X, Wu H-y, Wu N, Zhang X-j, Wang X, et al. (2016) Relationship of Liver X Receptors  $\alpha$  and Endoglin Levels in Serum and Placenta with Preeclampsia. PLoS ONE 11(10): e0163742. doi:10.1371/journal.pone.0163742

**Editor:** Gerrit J. Bouma, Colorado State University, UNITED STATES

**Received:** April 19, 2016

**Accepted:** September 13, 2016

**Published:** October 13, 2016

**Copyright:** © 2016 Wang et al. This is an open access article distributed under the terms of the [Creative Commons Attribution License](https://creativecommons.org/licenses/by/4.0/), which permits unrestricted use, distribution, and reproduction in any medium, provided the original author and source are credited.

**Data Availability Statement:** All relevant data are within the paper.

**Funding:** This project was supported by the National Natural Science Foundation of China, numbers 81050001, <http://www.nsf.gov.cn/>. WJ received the funding. The funder had role in study design.

**Competing Interests:** The authors have declared that no competing interests exist.

## Abstract

### Background

Liver X receptor alpha (LXR $\alpha$ ) and endoglin have been postulated to play roles in trophoblast invasion and lipid metabolic disturbances. However, the relationship between LXR $\alpha$  and endoglin levels in serum and placenta of patients with preeclampsia remains poorly understood. The objective of this study was to identify correlations between LXR $\alpha$ , endoglin and preeclampsia and provide new feasible methods of clinical prediction and treatment for preeclampsia.

### Methods

We enrolled 45 patients with preeclampsia (24 with moderate preeclampsia and 21 with severe preeclampsia) and 15 normal pregnant women (control group) who were admitted to the Department of Obstetrics of the General Hospital of Beijing Command between October 2012 and July 2013 in this study. Serum and placental LXR $\alpha$  and endoglin levels were analyzed by enzyme-linked immunosorbent assay, real-time quantitative PCR, tissue microarray and immunohistochemistry.

### Results

Serum and placental LXR $\alpha$  and endoglin levels were significantly higher in patients with preeclampsia than those in control group ( $P < 0.05$ , each). Moreover, patients with severe preeclampsia displayed significantly higher LXR $\alpha$  and endoglin levels than those with moderate preeclampsia ( $P < 0.05$ , each). The LXR $\alpha$  sensitivity, specificity and positive and negative predictive values were 66.00%, 80.00%, 89.19% and 48.48%, respectively, while those of endoglin levels were 62.00%, 85.00%, 91.18% and 47.22%, respectively. LXR $\alpha$  and endoglin levels in serum and placenta from patients with preeclampsia were positively correlated (serum:  $r = 0.486$ ,  $P < 0.01$ ; placenta:  $r = 0.569$ ,  $P < 0.01$ ).

### Conclusions

Elevated LXR $\alpha$  and endoglin levels may be associated with preeclampsia pathogenesis and development and could be used as potential predictors for this disorder.

## Introduction

Preeclampsia, a disorder unique to pregnancy, is a leading cause of maternal and perinatal mortality and morbidity with incompletely elucidated pathogenesis [1]. However, disease treatment is limited to symptomatic treatment, and individuals with severe preeclampsia may require pregnancy termination to avoid deterioration of the condition. Inadequate trophoblast invasion and uterine spiral artery remodeling leading to poor placental perfusion and hypoxia have been proposed to be involved in preeclampsia [2,3]. Additionally, lipid metabolic disturbances resulting in endothelial dysfunction trigger preeclampsia [4]. Recent observations suggested that abnormal liver X receptor alpha (LXR $\alpha$ ) and endoglin expression, associated with lipid metabolic disturbances and trophoblast proliferation, might play important roles in preeclampsia development [4,5].

LXR $\alpha$  belongs to the nuclear receptor superfamily and binds to and is activated by naturally occurring oxidized forms of cholesterol, known as oxysterols [6]. It plays a key role in cholesterol metabolism. To date, the role of LXR $\alpha$  in preeclampsia is largely uncharacterized. Some studies have found that LXR $\alpha$  inhibited trophoblast invasion, human chorionic gonadotropin secretion, cholesterol transport and high-density lipoprotein biosynthesis [7]. Thus, LXR $\alpha$  may play an important role in the occurrence and development of preeclampsia.

Endoglin is a trans-membrane glycoprotein that serves as a co-receptor for transforming growth factor (TGF)- $\beta$ 1 and TGF- $\beta$ 3 [8]. It is expressed on placental syncytiotrophoblasts and invasive cytotrophoblasts and participates in the regulation of placental trophoblast differentiation and invasion of the uterus during pregnancy. One study found that inhibition of endoglin translation in a human extravillous trophoblast cell line could improve the capacity of extravillous trophoblast invasion and spiral artery remodeling [9]. On the other hand, endoglin is also expressed on vascular endothelial cells, which are important not only in angiogenesis but also in maintaining a healthy blood vessel lining. If the blood vessel lining is disrupted, blood pressure increases, and excess protein may be excreted into the urine.

Henry-Berger et al. demonstrated that endoglin is a direct target of LXR $\alpha$  in human syncytiotrophoblast cells [10]. Treatment of human choriocarcinoma JAR cells with T0901317, a synthetic LXR-selective agonist, led to a significant increase in endoglin mRNA and protein levels. On the other hand, one study demonstrated that LXR (as a heterodimer with the retinoid X receptor) is able to bind the endoglin promoter on an LXR response element and mediates the activation of endoglin gene, thus affecting proliferation, migration and invasiveness of normal human trophoblast cells. To date, the correlation between LXR $\alpha$  and endoglin has been studied only *in vitro*.

The aims of this study were (1) to test whether there was a relationship between LXR $\alpha$  and endoglin levels and preeclampsia occurrence and development; and (2) to define the relationship between LXR $\alpha$  and endoglin. The ultimate goal was to provide the theoretical basis for the early diagnosis, prevention and treatment of preeclampsia.

## Materials and Methods

### Ethics Statement

The study was approved by the clinical research ethical committee of the General Hospital of Beijing Military Command, and informed written consent was obtained from all subjects.

### Study population

We selected 45 patients with preeclampsia (24 individuals with moderate and 21 with severe preeclampsia) from the Obstetrics Department of our hospital between October 2012 and July

2013. Individuals with systolic blood pressure  $\geq 140$  mmHg or diastolic blood pressure  $\geq 90$  mmHg and proteinuria  $\geq 1+$  (30 mg/dl) or  $\geq 0.3$  g/24 h by dipstick testing at gestational week 20 were defined as having moderate preeclampsia. Individuals with systolic blood pressure  $\geq 160$  mmHg or diastolic blood pressure  $\geq 110$  mmHg and proteinuria  $\geq 3+$  (300 mg/dl) or  $\geq 3.5$  g/24 h or with HELLP syndrome after 20 weeks of gestation were defined as having severe preeclampsia [11]. Additionally, 15 late pregnant women with normal blood pressure were randomly selected as controls. Exclusion criteria included diabetes, chronic hypertension, severe heart, liver or renal dysfunction, other obstetric or medical syndromes and history of smoking, drinking, drug abuse or mental illness. There were no significant differences in the age, gravidity or delivery between patients with preeclampsia and controls ( $P > 0.05$ ). However, neonatal and placental weights significantly differed between the two groups (Table 1).

### Sample collection

Four milliliters venous blood were collected from each individual following an overnight fast prior to preeclampsia treatment. After centrifugation for 15 minutes at 2500 r/min at 4°C, the supernatants were stored at -70°C until further analysis.

Two pieces of tissues were obtained immediately after delivery from the center of the maternal placental surface rather than the infarction and calcification area. The sample size was 1.0 cm  $\times$  1.0 cm  $\times$  1.0 cm. One sample was fixed with 10% paraformaldehyde for tissue microarray (TMA) preparation, and the other was stored at -80°C for real-time quantitative PCR (qRT-PCR) analysis.

### Enzyme-linked immunosorbent assay (ELISA) measurements

LXR $\alpha$  levels were measured with ELISA kits (DSL Co. Ltd, Shanghai, China). The sensitivity was 0.1 pg/mL. Endoglin levels were measured with ELISA kits (R&D Systems China Co. Ltd, Shanghai, China). The sensitivity was 0.01ng/mL. Operations were strictly carried out following up kit instructions.

### Tissue microarray (TMA) and immunohistochemistry analysis

TMA construction was performed as described previously [12]. Placental LXR $\alpha$  and endoglin expression was analyzed according to standard immunohistochemical methods [13]. The corresponding primary antibodies were purchased from Santa Cruz Biotechnology (Santa Cruz Biotechnology Inc., Santa Cruz, CA, USA; mouse anti-human LXR $\alpha$ , sc-377260, 1:100; mouse anti-human endoglin, sc-376381, 1:100). The staining intensity was graded [13] as follows: 0, no staining; 1, mild staining; 2, moderate staining; and 3, intense staining. Positive staining rate was scored as follows: 0, no staining of cells; 1, 1–25%; 2, 26–50%; and 3, > 50%. The sum of

**Table 1. Comparison of clinical data among groups.**

|         | n  | age(year)        | gestational age (w) | neonatal weight(g)     | placental weight (g) |
|---------|----|------------------|---------------------|------------------------|----------------------|
| control | 15 | 28.22 $\pm$ 4.98 | 38.01 $\pm$ 5.36    | 3355.22 $\pm$ 296.98   | 641.14 $\pm$ 58.39   |
| PE      | 45 | 29.63 $\pm$ 5.56 | 37.51 $\pm$ 5.62    | 3100.45 $\pm$ 303.44** | 585.42 $\pm$ 60.23** |
| MPE     | 24 | 28.41 $\pm$ 5.37 | 37.67 $\pm$ 6.19    | 3143.31 $\pm$ 315.75*  | 598.35 $\pm$ 65.48*  |
| SPE     | 21 | 30.35 $\pm$ 6.01 | 36.88 $\pm$ 5.21    | 2998.17 $\pm$ 331.77** | 576.21 $\pm$ 68.36** |

PE = preeclampsia. MPE = Moderate preeclampsia. SPE = Severe preeclampsia.

\*P<0.05 compared with control group.

\*\*P<0.01 compared with control group

doi:10.1371/journal.pone.0163742.t001

intensity and positive rate was designated as the staining score and graded as follows: 0–1 (-); 2 (+); 3–4 (++) and 5–6 (+++).

### qRT-PCR

Total RNA was isolated from placental tissues using TRIzol reagent (Invitrogen) according to the manufacturer’s instructions and reverse transcribed. qRT-PCR was performed with Universal SYBR Green PCR Master Mix using specific primers with the following sequences: LXR $\alpha$  forward 5'-TGGAGACATCTCGGAGGTAC-3', LXR $\alpha$  reverse 5'-GCAATGAGCAAGGCAAAC-3'; Endoglin forward 5'-TAGCCCTGCGTCCCAAGA-3', Endoglin reverse 5'-CGATGAGGAAGGCACCAAA-3'; GAPDH forward 5'-GAAGATGGTGATGGGAT TTC-3', GAPDH reverse 5'-GAAGGTGAAGGTCGGAGT-3'. The run conditions were: 94°C for 5 mins; 94°C for 30 seconds, 52°C for 30 seconds and 72°C for 40 seconds (30 cycles); and 72°C for 10 mins. Relative quantification was determined using the comparative CT method.

### Statistical analysis

All data analyses were performed using SPSS 13.0 software (SPSS Inc., Chicago, IL, USA). Results were presented as the mean $\pm$ SD. Clinical data and mean serum and placental gene levels of LXR $\alpha$  and endoglin among groups were compared by post-hoc pair-wise comparisons in ANOVA. Mean placental LXR $\alpha$  and endoglin protein expression levels were compared by the Mann–Whitney U test. Pearson and Spearman correlation coefficient analyses were performed to assess possible relationships. The receiver operating characteristic curve (ROC) analysis was performed to choose the best cut-off value for prediction and diagnosis of preeclampsia.  $P < 0.05$  was considered statistically significant.

## Results

### Comparison of serum LXR $\alpha$ and endoglin levels in preeclampsia group and control group

To assess associations between LXR $\alpha$  levels and clinical preeclampsia, serum LXR $\alpha$  levels were compared between patients with preeclampsia and normal pregnant women (control). As displayed in Table 2, LXR $\alpha$  levels in patients with preeclampsia were significantly higher than those in control group ( $P < 0.05$ ). Notably, LXR $\alpha$  levels in patients with severe preeclampsia were significantly higher than those in patients with moderate preeclampsia ( $P < 0.05$ ). The best cut-off value was 3.68  $\mu\text{g/ml}$  by ROC analysis. There were 33 cases in which LXR $\alpha$  levels exceeded 3.68  $\mu\text{g/ml}$  in the preeclampsia group but only 4 cases in the control group. The LXR $\alpha$  sensitivity, specificity and positive and negative predictive values were 66.00%, 80.00%, 89.19% and 48.48%, respectively.

**Table 2. Comparison of LXR $\alpha$  levels in serum among groups.**

|         | n  | LXR $\alpha$ ( $\mu\text{g/ml}$ ) |
|---------|----|-----------------------------------|
| Control | 15 | 2.88 $\pm$ 0.54                   |
| PE      | 45 | 4.91 $\pm$ 1.33*                  |
| MPE     | 24 | 4.27 $\pm$ 0.47*                  |
| SPE     | 21 | 6.23 $\pm$ 1.09**                 |

PE = preeclampsia. MPE = Moderate preeclampsia. SPE = Severe preeclampsia.

\* $P < 0.05$  compared with control group.

\*\*  $P < 0.05$  compared with MPE group.

doi:10.1371/journal.pone.0163742.t002

As expected, serum endoglin levels were also significantly higher in patients with preeclampsia than those in control group ( $P < 0.05$ ). Moreover, endoglin levels were significantly higher in patients with severe preeclampsia than those in patients with moderate preeclampsia (Table 3). The best cut-off value was 14.66 ng/ml by ROC analysis. There were 31 cases in which endoglin levels exceeded 14.66 ng/ml in the preeclampsia group but only 3 cases in the control group. The endoglin sensitivity, specificity and positive and negative predictive values were 62.00%, 85.00%, 91.18% and 47.22%, respectively.

### Placental LXR $\alpha$ and endoglin protein expression in preeclampsia group and control group

To confirm these findings in the placenta, a tissue microarray and immunohistochemistry were performed to assess LXR $\alpha$  expression in patients with preeclampsia and normal controls. The LXR $\alpha$  protein was localized to the membrane and cytoplasm of decidual cells and villous trophoblasts in the placentas of both patients with preeclampsia and normal controls (Fig 1A–1D). Importantly, placental LXR $\alpha$  levels in patients with preeclampsia were significantly higher than those of controls ( $P < 0.05$ ). Moreover, patients with severe preeclampsia also displayed higher LXR $\alpha$  expression than that of patients with moderate preeclampsia ( $P < 0.05$ ) (Table 4). Immunohistochemical analysis indicated that endoglin was expressed in the membrane and cytoplasm of placental decidual cells and villous trophoblasts (Fig 1E–1H). As expected, placental endoglin levels were positively associated with disease activity (Table 5).

### Placental LXR $\alpha$ and endoglin gene expression in preeclampsia group and control group

We next compared placental LXR $\alpha$  and endoglin mRNA levels by qRT-PCR. As displayed in Fig 2A and 2B, LXR $\alpha$  and endoglin expression in patients with preeclampsia was significantly higher than that in normal controls, and this increase was more significant in patients with severe preeclampsia. Taken together, these results suggested that placental LXR $\alpha$  and endoglin levels were upregulated in patients with preeclampsia and closely associated with preeclampsia disease activity.

### Correlations between LXR $\alpha$ and endoglin levels in serum and placenta

LXR $\alpha$  and endoglin levels in serum and placenta from patients with preeclampsia were positively correlated ( $r = 0.486$ ,  $P < 0.01$ ;  $r = 0.569$ ,  $P < 0.01$ ). Additionally, LXR $\alpha$  and endoglin levels in serum and placenta from the control group were also positively correlated ( $r = 0.493$ ,  $P < 0.01$ ;  $r = 0.475$ ,  $P < 0.01$ ).

**Table 3. Comparison of endoglin levels in serum among groups.**

|         | n  | Endoglin (ng/ml) |
|---------|----|------------------|
| Control | 15 | 11.18±4.33       |
| PE      | 45 | 29.12±6.24*      |
| MPE     | 24 | 27.59±7.84*      |
| SPE     | 21 | 38.25±9.04**     |

PE = preeclampsia. MPE = Moderate preeclampsia. SPE = Severe preeclampsia.

\* $P < 0.05$  compared with control group.

\*\*  $P < 0.05$  compared with MPE group.

doi:10.1371/journal.pone.0163742.t003



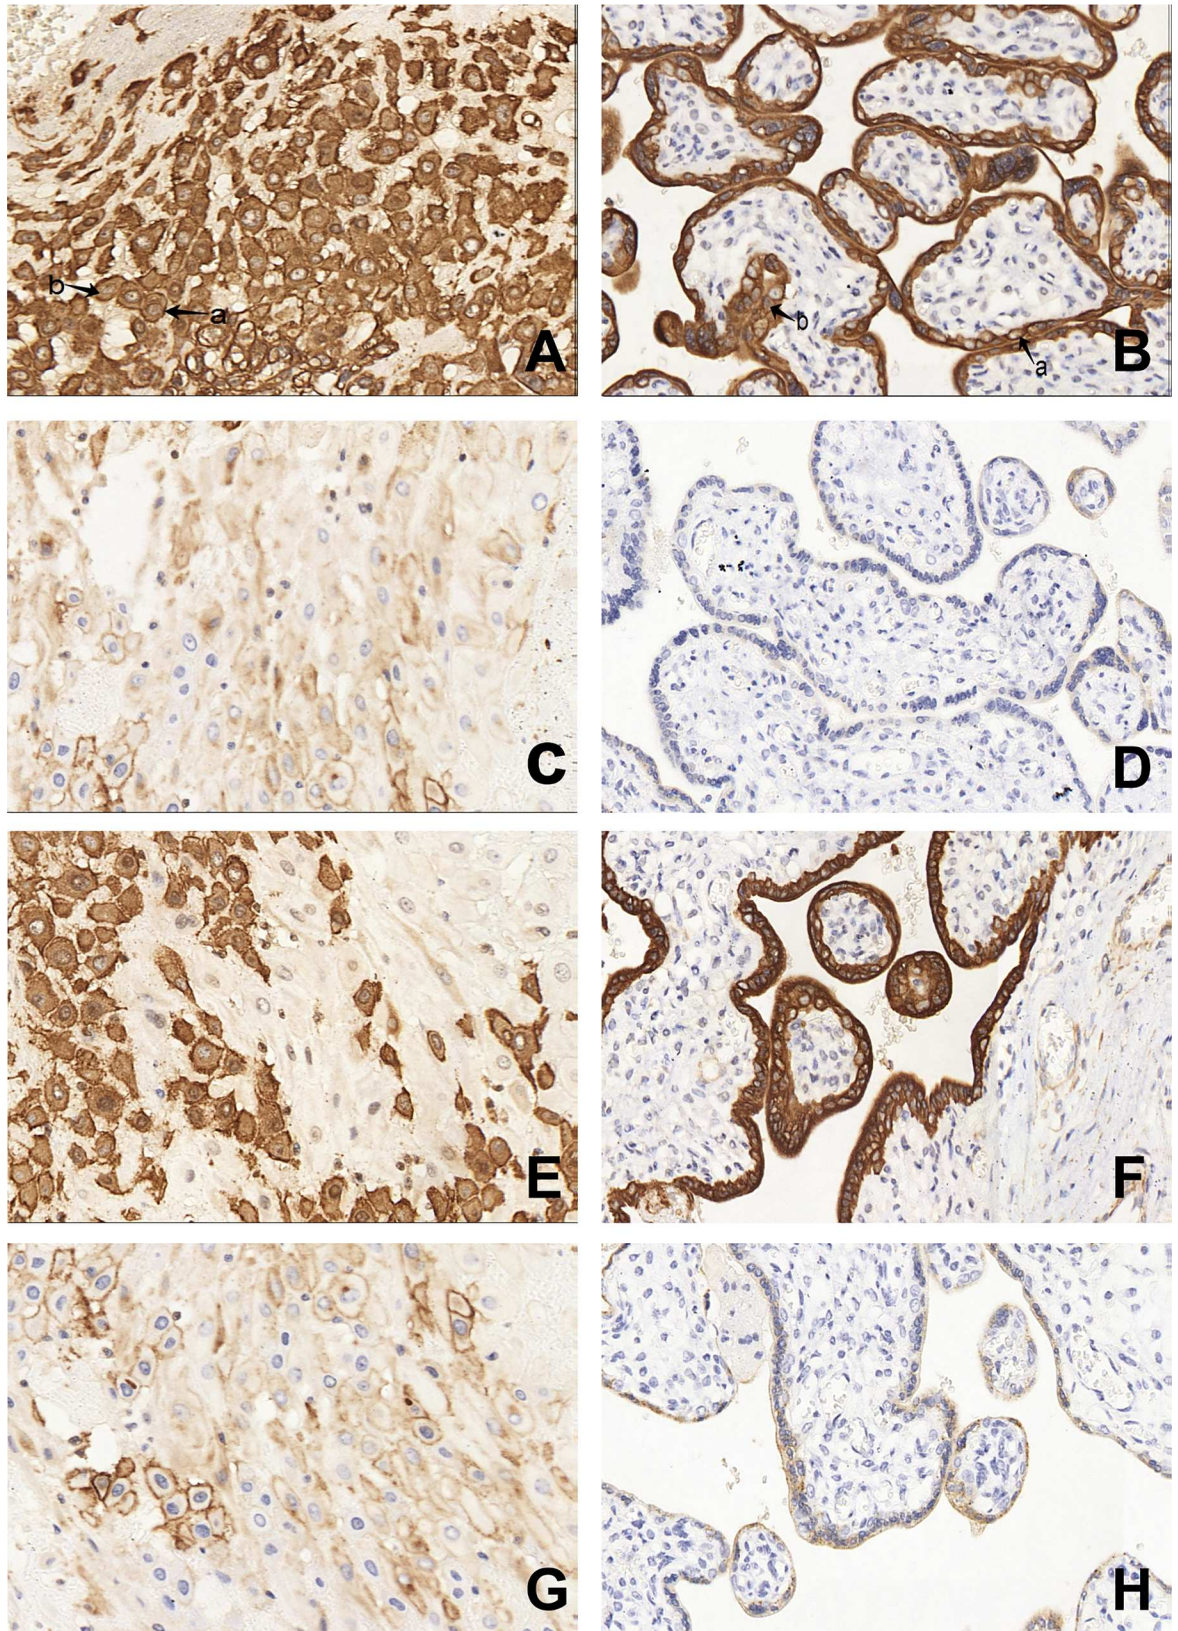

**Fig 1. TMA samples preparation and immunohistochemical staining of LXR $\alpha$  and endoglin expression in decidual cells and trophoblast cells from placentae of preeclampsia.** Expression of LXR $\alpha$  in preeclampsia decidual tissue (a membrane, b cytoplasm). (B) Expression of LXR $\alpha$  in preeclampsia villous trophoblastic tissue (a membrane, b cytoplasm). (C) Expression of LXR $\alpha$  in normal decidual tissue. (D) Expression of LXR $\alpha$  in normal villous trophoblastic tissue. (E) Expression of endoglin in preeclampsia decidual tissue. (F) Expression of endoglin in preeclampsia villous trophoblastic tissue. (G) Expression of endoglin in normal decidual tissue. (H) Expression of endoglin in normal villous trophoblastic tissue. Original magnification X400

doi:10.1371/journal.pone.0163742.g001

## Discussion

Preeclampsia is characterized by impaired function and disturbance of lipid metabolism, including reduced high density lipoprotein cholesterol and apolipoproteins A1 and B, which are protective for blood vessels, and increased total cholesterol, triglycerides, low density lipoprotein cholesterol and very low density lipoprotein cholesterol, which are destructive to blood vessels. Therefore, it is possible that lipid metabolism disorders may lead to preeclampsia development. Evidence suggests that LXR $\alpha$  is highly expressed in the liver, adipose tissue, kidney and spleen and is associated with abnormal lipid metabolism [14]. LXR $\alpha$  is a key regulator of placental lipid metabolism in pregnancy. It participates in cholesterol decomposition, absorption and transport and inhibits HCG secretion in trophoblasts [15]. However, the role of LXR $\alpha$  in preeclampsia remains unknown.

To the best of our knowledge, this is the first report comparing LXR $\alpha$  levels between patients with preeclampsia and normal pregnant women. Placental LXR $\alpha$  protein and mRNA levels were significantly higher in patients with preeclampsia than those in control subjects, and the increase was positively associated with disease severity. Thus, our data indicated that changes in LXR $\alpha$  levels might be closely related to preeclampsia development and progression. A number of studies have investigated the potential regulatory mechanisms underlying this observation. Specifically, Aye et al. [16] determined that LXR $\alpha$  suppressed trophoblast invasion and differentiation, thereby resulting in shallow placental implantation and preeclampsia development. Additionally, LXR $\alpha$  induced liver sterol regulatory element binding protein-1c expression [17,18], which caused an increase in liver and plasma triglycerides, free fatty acids and other peroxidase substrates. Subsequently, the following changes occur: lipid metabolism disorders, vascular endothelial cell damage, acute atherosclerosis of small arteries in the uterus and placenta and diminished placental function. Ultimately, preeclampsia results in severe complications, including fetal growth restriction and fetal intrauterine distress. Furthermore, LXR $\alpha$  activated the peroxisomal proliferator-activated receptor gamma retinoid X receptor pathway by upregulating low density lipoprotein production, producing toxic injury to trophoblasts and inhibiting trophoblast invasion, which resulted in disability of uterine spiral artery recasting and preeclampsia development [19]. Finally, LXR $\alpha$  enhanced macrophage TNF

**Table 4. Comparison of LXR $\alpha$  expression intensity in placenta among groups.**

|         | n  | LXR $\alpha$ |    |    |     | positive rate (%) |
|---------|----|--------------|----|----|-----|-------------------|
|         |    | -            | +  | ++ | +++ |                   |
| Control | 15 | 10           | 2  | 2  | 1   | 33.33             |
| PE      | 45 | 8            | 12 | 12 | 13  | 82.22 *           |
| MPE     | 24 | 7            | 6  | 5  | 6   | 70.83 *           |
| SPE     | 21 | 1            | 6  | 7  | 7   | 95.24 **          |

PE = preeclampsia. MPE = Moderate preeclampsia. SPE = Severe preeclampsia.

\*P<0.05 compared with control group.

\*\* P<0.05 compared with MPE group.

doi:10.1371/journal.pone.0163742.t004



**Table 5. Comparison of Endoglin expression intensity in placenta among groups.**

|         | n  | Endoglin |    |    |     | positive rate (%) |
|---------|----|----------|----|----|-----|-------------------|
|         |    | -        | +  | ++ | +++ |                   |
| Control | 15 | 12       | 1  | 1  | 1   | 20.00             |
| PE      | 45 | 13       | 11 | 11 | 10  | 71.11*            |
| MPE     | 24 | 10       | 6  | 5  | 3   | 58.33*            |
| SPE     | 21 | 3        | 5  | 6  | 7   | 85.71**           |

PE = preeclampsia. MPE = Moderate preeclampsia. SPE = Severe preeclampsia.

\*P<0.05 compared with control group.

\*\*P<0.05 compared with MPE group.

doi:10.1371/journal.pone.0163742.t005

mRNA levels to induce local inflammation [18], thereby causing apoptosis of endothelial and smooth muscle cells, T cell invasion and local tissue necrosis. Moreover, TNF induced production of prostaglandin and endothelin, which are strong vasoconstrictors, in vascular endothelial cells and caused vascular contraction and blood pressure elevation. These are only possible mechanisms, and a biological role of LXR $\alpha$  in preeclampsia warrants further investigation.

Another finding of this study was that serum LXR $\alpha$  levels in patients with preeclampsia were also significantly higher than controls, and those from severe individuals were higher than those from patients with moderate preeclampsia. Thus, serum LXR $\alpha$  levels may be tested to monitor the occurrence and severity of preeclampsia. Additionally, the sensitivity and specificity of LXR $\alpha$  were 66.00% and 80.00%, respectively, indicating that LXR $\alpha$  measurements provided high sensitivity and specificity for established preeclampsia diagnosis and may be used as a novel predictor for clinical application.

Endoglin, part of the TGF- $\beta$  receptor complex, was predominately expressed on vascular endothelial cells and involved in TGF- $\beta$  and TGF- $\beta$  receptor signaling. By antagonizing the inhibitory effects of TGF- $\beta$ 1 on vascular endothelial cell proliferation, endoglin can promote angiogenesis and is a biomarker of endothelial cell proliferation. Endoglin expression is

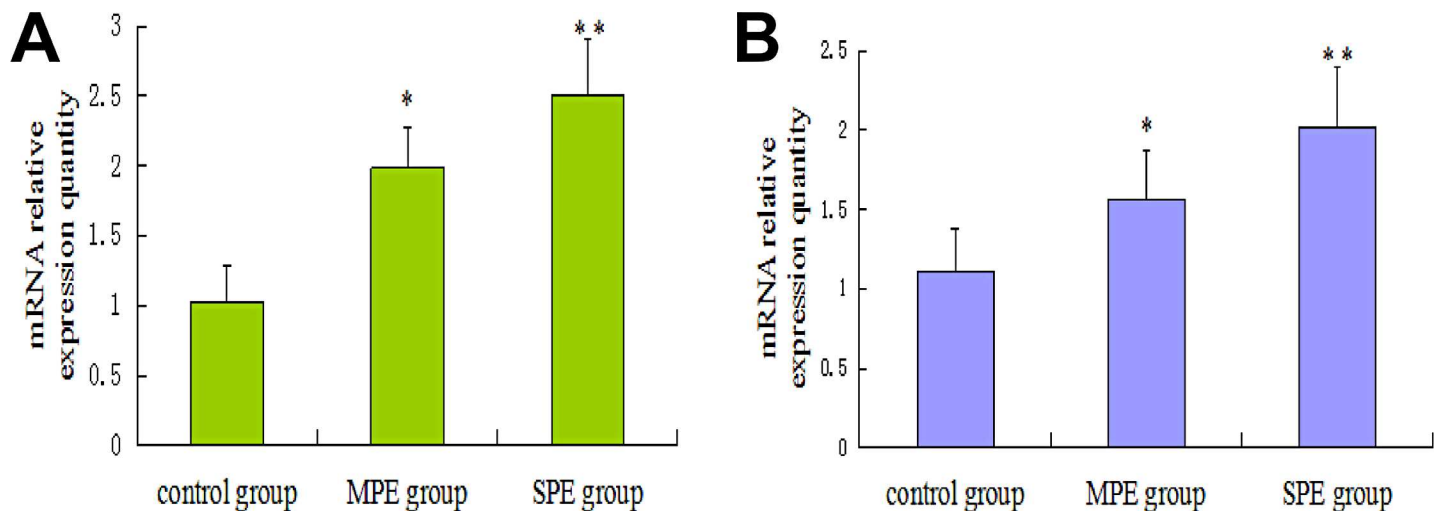

**Fig 2. Real-time quantitative PCR analysis of LXR $\alpha$  and Endoglin levels in each group of placentas.** (A) LXR $\alpha$  mRNA level was examined by qRT-PCR in each group of placentas. (B) Endoglin mRNA level was examined by qRT-PCR in each group of placentas. MPE = Moderate preeclampsia. SPE = Severe preeclampsia. \*P<0.05 compared with control group. \*\*P<0.05 compared with MPE group.

doi:10.1371/journal.pone.0163742.g002



significantly upregulated during pregnancy and is rapidly reduced after delivery, indicating that the placenta may be the primary source of endoglin during pregnancy [20].

Recent studies [20,21] demonstrated that serum endoglin concentrations were significantly increased in patients with preeclampsia and positively associated with preeclampsia severity. Tarek et al. [22] reported that serum endoglin levels were significantly higher in pregnant women with high-risk preeclampsia than in healthy pregnant women at gestational week 13. Additionally, endoglin levels were significantly higher in patients with early-onset preeclampsia than those in patients with late-onset preeclampsia. Furthermore, soluble endoglin levels were positively correlated with blood pressure as well as urinary proteins. Our study demonstrated dramatically higher serum endoglin levels in the preeclampsia group compared with those in the control group, and this increase was strongly positively correlated with disease severity. Interestingly, these results were in agreement with those of Stepan et al. [23]. Additionally, the endoglin sensitivity, specificity, and positive and negative predictive values were 62.00%, 85.00%, 91.18% and 47.22%, respectively (The PPV and NPV would be very different in an unselected population of pregnant women). Collectively, these results indicated that serum endoglin concentration was useful for predicting preeclampsia and may be a new forecast index for clinical application.

Our study determined that placental endoglin protein and mRNA levels in patients with preeclampsia were distinctly higher than those in normal controls. This difference was more apparent in individuals with severe preeclampsia compared with that in individuals with moderate preeclampsia. Therefore, our data indicated that increased endoglin was associated with preeclampsia development and progression. Venkatesha et al. [20] found that the permeability of organs, including liver, lung and kidney, was significantly increased when mice were injected with an adenovirus expressing soluble endoglin. Their findings suggested that overexpression of soluble endoglin can enhance vascular permeability and reduce placental perfusion by damaging the integrity of endothelial cells. Recent studies have indicated that endoglin can inhibit NO and heme oxygenase-1 (HO-1) synthesis and reduce production of CO and bilirubin, thereby leading to endothelial dysfunction, blood pressure elevation and development of severe preeclampsia [24–26].

Henry-Berger et al. [10] reported that endoglin was highly expressed in choriocarcinoma JAR cells following stimulation with LXR $\alpha$  activators. They demonstrated that LXR $\alpha$  binds the endoglin promoter and mediates endoglin activation. We determined that LXR $\alpha$  expression positively correlated with endoglin expression in serum and placenta from patients with preeclampsia. These results indicate that increased LXR $\alpha$  might inhibit the proliferation, infiltration and migration ability of trophoblasts by upregulating endoglin production and thus participating in preeclampsia development.

In conclusion, LXR $\alpha$  and endoglin levels may be involved in preeclampsia development and progression and may be used as biomarkers for clinical application. In the future, effective suppression of placental LXR $\alpha$  and endoglin expression or neutralization of LXR $\alpha$  and endoglin activation in the circulation may provide new methods to prevent and treat preeclampsia. Future studies will address the following: 1) analyze early-stage pregnant women and confirm that LXR $\alpha$  abnormalities occur prior to established disease; 2) expand the number and diversity of subjects; 3) measure these in a more thorough prospective study where LXR $\alpha$ , potentially in conjunction with endoglin of later severe PE, to determine if it can identify future disease. Further research is currently under investigation in our laboratory.

## Acknowledgments

We are grateful to Miss Wei Du, Mrs. Mei-Yan Wu and Miss Cai-Xia Yang for help recruiting patients for this study.

## Author Contributions

**Conceptualization:** JW LXS.

**Data curation:** JW LXS.

**Formal analysis:** XD.

**Investigation:** JW XW NW HYW.

**Methodology:** JW XD XW.

**Resources:** XJZ.

**Supervision:** LXS.

**Validation:** JW.

**Writing – original draft:** JW XD.

**Writing – review & editing:** JW LXS.

## References

1. Ramma W, Ahmed A. Is inflammation the cause of pre-eclampsia? *Biochem Soc Trans.* 2011 Dec; 39(6):1619–27. doi: [10.1042/BST20110672](https://doi.org/10.1042/BST20110672) PMID: [22103497](https://pubmed.ncbi.nlm.nih.gov/22103497/)
2. Maynard SE, Karumanchi SA. Angiogenic factors and preeclampsia. *Semin Nephrol.* 2011 Jan; 31(1):33–46. doi: [10.1016/j.semnephrol.2010.10.004](https://doi.org/10.1016/j.semnephrol.2010.10.004) PMID: [21266263](https://pubmed.ncbi.nlm.nih.gov/21266263/)
3. Craici IM, Wagner SJ, Weissgerber TL, Grande JP, Garovic VD. Advances in the pathophysiology of pre-eclampsia and related podocyte injury. *Kidney Int.* 2014 Aug; 86(2):275–85. doi: [10.1038/ki.2014.17](https://doi.org/10.1038/ki.2014.17) PMID: [24573315](https://pubmed.ncbi.nlm.nih.gov/24573315/)
4. Mouzat K, Mercier E, Polge A, Evrard A, Baron S, Balducchi JP, et al. A common polymorphism in NR1H2 (LXRbeta) is associated with preeclampsia. *BMC Med Genet.* 2011 Oct; 26(12): 145–54.
5. Bell MJ, Conley YP. A systematic review of endoglin gene expression in preeclampsia. *Biol Res Nurs.* 2013 Apr; 15(2): 129–36. doi: [10.1177/1099800411420133](https://doi.org/10.1177/1099800411420133) PMID: [21921088](https://pubmed.ncbi.nlm.nih.gov/21921088/)
6. Viennois E, Pommier AJ, Mouzat K, Oumeddour A, El Hajjaji FZ, Dufour J, et al. Targeting liver X receptors in human health: deadlock or promising trail? *Expert Opin Ther Targets.* 2011 Feb; 15(2): 219–32. doi: [10.1517/14728222.2011.547853](https://doi.org/10.1517/14728222.2011.547853) PMID: [21204733](https://pubmed.ncbi.nlm.nih.gov/21204733/)
7. Burke KT, Colvin PL, Myatt L, Graf GA, Schroeder F, Woollett LA. Transport of maternal cholesterol to the fetus is affected by maternal plasma cholesterol concentrations in the golden Syrian hamster. *J. Lipid Res.* 2009 Jun; 50(6): 1146–55. doi: [10.1194/jlr.M800538-JLR200](https://doi.org/10.1194/jlr.M800538-JLR200) PMID: [19122238](https://pubmed.ncbi.nlm.nih.gov/19122238/)
8. Bell MJ1, Roberts JM, Founds SA, Jeyabalan A, Terhorst L, Conley YP. Variation in endoglin pathway genes is associated with preeclampsia: a case-control candidate gene association study. *BMC Pregnancy and Childbirth.* 2013 Apr1; 13(82):1–9.
9. Mano Y, Kotani T, Shibata K, Matsumura H, Tsuda H, Sumigama S, et al. The loss of endoglin promotes the invasion of extravillous trophoblasts. *Endocrinology.* 2011 Nov; 152(11):4386–94. doi: [10.1210/en.2011-1088](https://doi.org/10.1210/en.2011-1088) PMID: [21914777](https://pubmed.ncbi.nlm.nih.gov/21914777/)
10. Henry-Berger J, Mouzat K, Baron S, Bernabeu C, Marceau G, Saru JP, et al. Endoglin (CD105) expression is regulated by the liver X receptor alpha (NR1H3) in human trophoblast cell line JAR. *Biol Reprod.* 2008 Jun; 78(6): 968–75. doi: [10.1095/biolreprod.107.066498](https://doi.org/10.1095/biolreprod.107.066498) PMID: [18276933](https://pubmed.ncbi.nlm.nih.gov/18276933/)
11. ACOG Committee on Practice Bulletins—Obstetrics. ACOG practice bulletin. Diagnosis and management of preeclampsia and eclampsia. *Obstet Gynecol.* 2002 Jan; 99(1): 159–67.
12. Yan DW, Li DW, Yang YX, Xia J, Wang XL, Zhou CZ, et al. Ubiquitin D is correlated with colon cancer progression and predicts recurrence for stage II-III disease after curative surgery. *Br J Cancer.* 2010 Sep28; 103(7): 961–9. doi: [10.1038/sj.bjc.6605870](https://doi.org/10.1038/sj.bjc.6605870) PMID: [20808312](https://pubmed.ncbi.nlm.nih.gov/20808312/)
13. Zhang Y, Zhang M, Yu F, Lu S, Sun H, Tang H, et al. Karyopherin alpha 2 is a novel prognostic marker and a potential therapeutic target for colon cancer. *J Exp Clin Cancer Res.* 2015 Dec; 34(1): 145–56.
14. Larkin JC, Sears SB, Y. Sadosky Y. The influence of ligand-activated LXR on primary human trophoblasts. *Placenta.* 2014 Nov; 35(11): 919–24. doi: [10.1016/j.placenta.2014.09.002](https://doi.org/10.1016/j.placenta.2014.09.002) PMID: [25255963](https://pubmed.ncbi.nlm.nih.gov/25255963/)

15. Weedon-Fekjaer MS, Duttaroy AK, Nebb HI. Liver X receptors mediate inhibition of hCG secretion in a human placental trophoblast cell line. *Placenta*. 2005 Nov; 26(10): 721–8. doi: [10.1016/j.placenta.2004.10.005](https://doi.org/10.1016/j.placenta.2004.10.005) PMID: [16226121](https://pubmed.ncbi.nlm.nih.gov/16226121/)
16. Aye IL, Waddell BJ, Mark PJ, Keelan JA. Inhibit differentiation and fusion of term primary trophoblasts by activating liver X receptors. *Placenta*. 2011 Feb; 32(2): 183–91. doi: [10.1016/j.placenta.2010.12.007](https://doi.org/10.1016/j.placenta.2010.12.007) PMID: [21208656](https://pubmed.ncbi.nlm.nih.gov/21208656/)
17. Schultz JR, Tu H, Luk A, Repa JJ, Medina JC, Li L, et al. Role of LXRs in control of lipogenesis. *Genes Dev*. 2000 Nov 15; 14(22): 2831–8. PMID: [11090131](https://pubmed.ncbi.nlm.nih.gov/11090131/)
18. Landis MS, Patel HV, Capone JP. Oxysterol activators of liver X receptor and 9-cis-retinoic acid promote sequential steps in the synthesis and secretion of tumor necrosis factor- $\alpha$  from human monocytes. *J Biol Chem*. 2002 Feb 15; 277(7): 4713–21. doi: [10.1074/jbc.M108807200](https://doi.org/10.1074/jbc.M108807200) PMID: [11741944](https://pubmed.ncbi.nlm.nih.gov/11741944/)
19. Pavan L, Hermouet A, Tsatsaris V, Therond P, Sawamura T, Evain-Brion D, et al. Lipids from oxidized low-density lipoprotein modulate human trophoblast invasion: involvement of nuclear liver X receptors. *Endocrinology*. 2004 Oct; 145(10): 4583–91. doi: [10.1210/en.2003-1747](https://doi.org/10.1210/en.2003-1747) PMID: [15242983](https://pubmed.ncbi.nlm.nih.gov/15242983/)
20. Venkatesha S, Toporsian M, Lam C, Hanai J, Mammoto T, Kim YM, et al. Soluble endoglin contributes to the pathogenesis of preeclampsia. *Nat Med*. 2006 Jun; 12(6): 642–9. doi: [10.1038/nm1429](https://doi.org/10.1038/nm1429) PMID: [16751767](https://pubmed.ncbi.nlm.nih.gov/16751767/)
21. Jeyabalan A, McGonigal S, Gilmour C, Hubel CA, Rajakumar A. Circulating and placental endoglin concentrations in pregnancies complicated by intrauterine growth restriction and preeclampsia. *Placenta*. 2008 Jun; 29(6): 555–63. doi: [10.1016/j.placenta.2008.03.006](https://doi.org/10.1016/j.placenta.2008.03.006) PMID: [18462791](https://pubmed.ncbi.nlm.nih.gov/18462791/)
22. Elhawary TM, El-Bendary AS, Demerdash H. Maternal serum endoglin as an early marker of preeclampsia in high-risk patients. *Int J Womens Health*. 2012; 4:521–5. doi: [10.2147/IJWH.S35318](https://doi.org/10.2147/IJWH.S35318) PMID: [23071422](https://pubmed.ncbi.nlm.nih.gov/23071422/)
23. Stepan H, Geipel A, Schwarz F, Krämer T, Wessel N, Faber R. Circulatory soluble endoglin and its predictive value for preeclampsia in second-trimester pregnancies with abnormal uterine perfusion. *Am J Obstet Gynecol*. 2008 Feb; 198(2): 175.e1–6.
24. Toporsian M, Gros R, Kabir MG, Vera S, Govindaraju K, Eidelman DH, et al. A role for endoglin in coupling eNOS activity and regulating vascular tone revealed in hereditary hemorrhagic telangiectasia. *Circ Res*. 2005 Apr 1; 96(6): 684–92. doi: [10.1161/01.RES.0000159936.38601.22](https://doi.org/10.1161/01.RES.0000159936.38601.22) PMID: [15718503](https://pubmed.ncbi.nlm.nih.gov/15718503/)
25. Cudmore M, Ahmad S, Al-Ani B, Fujisawa T, Coxall H, Chudasama K, et al. Negative regulation of soluble Flt-1 and soluble endoglin release by heme oxygenase-1. *Circulation*. 2007 Apr 3; 115(13): 1789–97. doi: [10.1161/CIRCULATIONAHA.106.660134](https://doi.org/10.1161/CIRCULATIONAHA.106.660134) PMID: [17389265](https://pubmed.ncbi.nlm.nih.gov/17389265/)
26. Ahmed A, Ramma W. Unravelling the theories of pre-eclampsia: are the protective pathways the new paradigm? *Br J Pharmacol*. 2015 Mar; 172(6):1574–86. doi: [10.1111/bph.12977](https://doi.org/10.1111/bph.12977) PMID: [25303561](https://pubmed.ncbi.nlm.nih.gov/25303561/)
